# Supplementary material for: Adhesive-free adhesion between polytetrafluoroethylene (PTFE) and isobutylene–isoprene rubber (IIR) via heat-assisted plasma treatment
Source: Royal Society of Chemistry journal article supplement (doi:10.1039/c6ra27642c), 2017-01-01
Supplement: c6ra27642c2.pdf [file c6ra27642c2.pdf]

## Electronic Supporting Information (ESI)

### **Adhesive-free adhesion between polytetrafluoroethylene (PTFE) and isobutylene–isoprene rubber (IIR) via heat-assisted plasma treatment**

Yuji Ohkubo<sup>\*,†</sup>, Kento Ishihara<sup>†</sup>, Haruka Sato<sup>†</sup>, Masafumi Shibahara<sup>‡</sup>, Asahiro Nagatani<sup>‡</sup>, Koji Honda<sup>‡</sup>, Katsuyoshi Endo<sup>†</sup>, and Kazuya Yamamura<sup>†</sup>

<sup>†</sup>Graduate School of Engineering, Osaka University, 2-1 Yamadaoka, Suita, Osaka 565-0871, Japan

<sup>‡</sup>Hyogo Prefectural Institute of Technology, 3-1-12 Yukihirocho, Kobe, Hyogo 654-0037, Japan

#### **Contents**

|               |       |
|---------------|-------|
| ● Video ..... | ESI-1 |
|---------------|-------|

**ESI-1** Video about IIR material failure during the T-peel test.

Plasma-treated PTFE at 65 W and unvulcanized IIR were thermally compressed and the adhesion strength of the IIR/PTFE composite was evaluated via a T-peel test. Because of its high adhesion, IIR material failure happened during the T-peel test.
